# Supplementary material
Source: publisher figshare collection journal article supplement (https://karger.figshare.com/ndownloader/files/15190388)
Supplement: Supplementary file 1 [file 15190388]

| Variable                                                                                   | group difference<br>T0/T1 | group difference         | Time effect in<br>IMPULS group<br>T0/T1 | Time effect in<br>Control Group T0/T1 | Time effect in<br>IMPULS group<br>T0/T2 | Time effect in<br>Control Group T0/T2 |
|--------------------------------------------------------------------------------------------|---------------------------|--------------------------|-----------------------------------------|---------------------------------------|-----------------------------------------|---------------------------------------|
| <i>Primary outcome:</i> Binge eating episodes in the past four weeks, logarithmised values | -.08<br>(-.31 to .16)     | -.19<br>(-.32 to -.06)   | -.36<br>(-.49 to -.23)                  | -.28<br>(-.48 to -.09)                | -.26<br>(-.36 to -.16)                  | -.65<br>(-.15 to .02)                 |
| <i>Primary outcome:</i> Binge eating episodes in the past four weeks, original values      | -3.27<br>(-8.72 to 2.18)  | -3.22<br>(-6.24 to -.20) | -6.94<br>(-10.17 to -3.71)              | -3.67<br>(-8.06 to .72)               | -3.78<br>(-5.99 to -1.57)               | -.56<br>(-2.62 to 1.49)               |
| Abstinence rate*                                                                           | .37 (-.89 to 1.64)        | -1.33 (-2.61 to -.06)    | -                                       | -                                     | -                                       | -                                     |
| Clinically relevant change*                                                                | -.95 (-1.96 to .05)       | -1.08 (-2.09 to -.07)    | -                                       | -                                     | -                                       | -                                     |
| Deterioration rate*                                                                        | 1.37 (-.29 to 3.03)       | .81 (-.51 to 2.12)       | -                                       | -                                     | -                                       | -                                     |
| Binge eating days in the past four weeks                                                   | -2.26<br>(-6.69 to 2.16)  | -2.42<br>(-4.80 to -.04) | -5.66<br>(-7.91 to -3.41)               | -3.39<br>(-7.21 to .42)               | -2.92<br>(-4.51 to -1.34)               | -.50<br>(-2.27 to 1.27)               |
| Binge eating episodes in month 2, logarithmised values                                     | -.03<br>(-.29 to .24)     | -.10<br>(-.23 to .03)    | -.25<br>(-.40 to -.09)                  | -.22<br>(-.44 to .00)                 | -.24<br>(-.33 to -.16)                  | -.15<br>(-.25 to -.05)                |
| Binge eating episodes in month 2, original values                                          | -.43<br>(-6.59 to 5.73)   | -.91<br>(-3.70 to 1.88)  | -5.22<br>(-9.11 to -1.33)               | -4.79<br>(-9.57 to -.01)              | -3.87<br>(-5.62 to -2.11)               | -2.96<br>(-5.13 to -.78)              |
| Binge eating days in month 2                                                               | .78 (-3.70 to 5.26)       | -.55 (-2.68 to 1.58)     | -3.25 (-5.61 to -.89)                   | -4.03 (-7.84 to -.22)                 | -2.61 (-3.82 to -.31)                   | -2.06 (-3.82 to -.31)                 |
| Binge eating episodes in month 3, logarithmised values                                     | .00<br>(-.30 to .30)      | -.08<br>(-.20 to .04)    | -.22<br>(-.42 to -.02)                  | -.22<br>(-.44 to -.00)                | -.25<br>(-.33 to -.17)                  | -.17<br>(-.26 to -.08)                |
| Binge eating episodes in month 3, original values                                          | -.09<br>(-7.38 to 7.20)   | -.29<br>(-3.33 to 2.76)  | -5.88<br>(-11.02 to -.73)               | -5.79<br>(-10.95 to -.62)             | -3.98<br>(-6.00 to -1.97)               | -3.70<br>(-5.98 to -1.42)             |
| Binge eating days in month 3                                                               | .57 (-4.20 to 5.34)       | .00 (-1.92 to 1.92)      | -3.22 (-5.74 to -.70)                   | -3.79 (-7.83 to .26)                  | -2.50 (-3.56 to -1.44)                  | -2.50 (-4.10 to -.90)                 |
| BMI (kg/m <sup>2</sup> )                                                                   | .14 (-.67 to .94)         | .14 (-.41 to .69)        | .07 (-.34 to .48)                       | -.07 (-.076 to .63)                   | -.20 (-.56 to .16)                      | -.34 (-.75 to .08)                    |
| EDE total score                                                                            | -.26 (-.61 to .09)        | -.09 (-.28 to .10)       | -.48 (-.75 to -.21)                     | -.22 (-.45 to .01)                    | -.26 (-.41 to -.12)                     | -.17 (-.29 to -.05)                   |
| EDE-Q total score                                                                          | -.39 (-.70 to -.08)       | -.19 (-.40 to .01)       | -.62 (-.86 to -.39)                     | -.23 (-.43 to -.03)                   | -.34 (-.51 to -.17)                     | -.15 (-.27 to -.03)                   |
| DEBQ total score                                                                           | -.18 (-.37 to .02)        | -.15 (-.27 to -.04)      | -.33 (-.46 to -.20)                     | -.15 (-.29 to -.02)                   | -.29 (-.38 to -.19)                     | -.13 (-.20 to -.07)                   |
| DEBQ external eating                                                                       | -.36 (-.68 to -.04)       | -.26 (-.43 to -.09)      | -.52 (-.71 to -.34)                     | -.16 (-.43 to .10)                    | -.37 (-.50 to -.24)                     | -.11 (-.23 to .00)                    |
| BDI II total score                                                                         | -3.71 (-6.60 to 0.26)     | -3.18 (-5.14 to -1.22)   | -4.01 (-6.51 to -1.51)                  | -.84 (-3.19 to 1.52)                  | -2.87 (-4.46 to -1.27)                  | .32 (-.83 to 1.46)                    |
| BIS-15 total score                                                                         | -.35 (-3.09 to 2.39)      | -.15 (-1.43 to 1.13)     | -.95 (-2.70 to .80)                     | -.60 (-2.73 to 1.53)                  | -.40 (-1.44 to .63)                     | -.26 (-1.04 to .53)                   |
| BIS total score                                                                            | -.13 (-.33 to .08)        | .03 (-.09 to .15)        | -.08 (-.22 to .06)                      | .04 (-.11 to .20)                     | -.05 (-.13 to .03)                      | -.07 (-.16 to .01)                    |
| BAS total score                                                                            | -.06 (-.10 to .08)        | -.02 (-.09 to .05)       | -.07 (-.17 to .04)                      | -.01 (-.10 to .08)                    | -.04 (-.09 to .00)                      | -.02 (-.07 to .03)                    |

**Notes.** All values adjusted for baseline (T0), not adjusted for multiple comparisons.

Abstinence rate, no BE episodes in the past four weeks; BAS, Behavioral Activation System; BIS, Behavioral Inhibition System; BIS-15, Barratt Impulsiveness Scale (short version); BDI II, Beck Depression Inventory (second version); BMI, Body Mass Index; Clinically relevant change, min. 50% reduction of BE episodes in the past four weeks; DEBQ, Dutch Eating Behaviour Questionnaire; Deterioration rate, min. 50% increase of BE episodes in the past four weeks; EDE, Eating Disorder Examination Interview; EDE-Q, Eating Disorder Examination Questionnaire; T0, baseline, T1, end of 8-week intervention; T2, end of 3-month post-intervention follow-up.

\* no time effects per group computed as data was analysed with logistic regressions instead of generalised estimating equations due to constant values at baseline.
